# Supplementary material for: Modelling the onset of senescence at the G1/S cell cycle checkpoint
Source: PubMed Central journal article supplement (PMC4243082; doi:10.1186/1471-2164-15-s7-s7), 2014-10-27
Supplement: 1471-2164-15-S7-S7-S1.pdf [file 1471-2164-15-S7-S7-S1.pdf]

## Supplementary Material

Paper: Modelling the onset of senescence at the G1/S cell cycle checkpoint

Authors: José CM Mombach, Cristhian A Bugs and Claudine Chaouiya

Stable states for the wild type situation and a range of perturbations corresponding to Loss-of-Function (LoF) and Gain-of-Function (GoF) *in silico* experiments (see also Table 3). Results were obtained using GINsim. For a LoF, the component value is constrained to value 0, whereas for a GoF the value is constrained to value 1 (for a Boolean case), or within a range of positive values (indicated between square brackets). States are displayed in the same way as in Figure 2. Each of the 9 combinations of SSB and DSB values (2 right-most columns) leads to a unique stable state denoting a cell fate defined by the values of the outputs (4 left-most columns). Below each table, a short interpretation indicates the main phenotypic changes compared to the wild type situation.

| Wild type case |             |            |               |       |       |      |        |     |     |     |          |         |           |        |          |     |     |     |     |     |
|----------------|-------------|------------|---------------|-------|-------|------|--------|-----|-----|-----|----------|---------|-----------|--------|----------|-----|-----|-----|-----|-----|
| apoptosis      | cyclearrest | senescence | proliferation | CHEK1 | CHEK2 | Mdm2 | p14ARF | p53 | p21 | RB1 | p16INK4a | p38MAPK | CDK46CycD | Cdc25A | CDK2CycE | E2F | ATM | ATR | DSB | SSB |
|                |             |            | 1             |       |       |      | 1      |     |     |     |          |         | 1         | 2      | 1        | 1   |     |     |     |     |
|                | 1           |            |               |       |       | 1    |        | 1   | 1   | 1   | 1        | 1       |           | 1      |          |     |     | 1   |     | 1   |
|                | 1           |            |               |       |       | 1    |        | 1   | 1   | 1   | 1        | 1       |           | 1      |          |     | 1   |     | 1   |     |
|                | 1           |            |               |       |       | 1    |        | 1   | 1   | 1   | 1        | 1       |           | 1      |          |     | 1   | 1   | 1   | 1   |
|                | 1           |            |               | 1     |       | 1    |        | 1   | 1   | 1   | 1        | 1       |           | 1      |          |     |     | 2   |     | 2   |
|                | 1           |            |               | 1     |       | 1    |        | 1   | 1   | 1   | 1        | 1       |           | 1      |          |     | 1   | 2   | 1   | 2   |
|                | 1           | 1          |               | 1     | 1     | 1    |        | 1   | 1   | 1   | 1        | 2       |           |        |          |     | 2   |     | 2   |     |
|                | 1           | 1          |               | 1     | 1     | 1    |        | 1   | 1   | 1   | 1        | 2       |           |        |          |     | 2   | 1   | 2   | 1   |
| 1              | 1           |            |               | 1     | 1     |      | 1      | 2   | 1   | 1   | 2        | 3       |           |        |          |     | 2   | 2   | 2   | 2   |

| CHEK2 LoF |             |            |               |       |       |      |        |     |     |     |          |         |           |        |          |     |     |     |     |     |
|-----------|-------------|------------|---------------|-------|-------|------|--------|-----|-----|-----|----------|---------|-----------|--------|----------|-----|-----|-----|-----|-----|
| apoptosis | cyclearrest | senescence | proliferation | CHEK1 | CHEK2 | Mdm2 | p14ARF | p53 | p21 | RB1 | p16INK4a | p38MAPK | CDK46CycD | Cdc25A | CDK2CycE | E2F | ATM | ATR | DSB | SSB |
|           |             |            | 1             |       |       |      | 1      |     |     |     |          |         | 1         | 2      | 1        | 1   |     |     |     |     |
|           | 1           |            |               |       |       | 1    |        | 1   | 1   | 1   | 1        | 1       |           | 1      |          |     |     | 1   |     | 1   |
|           | 1           |            |               |       |       | 1    |        | 1   | 1   | 1   | 1        | 1       |           | 1      |          |     | 1   |     | 1   |     |
|           | 1           |            |               |       |       | 1    |        | 1   | 1   | 1   | 1        | 1       |           | 1      |          |     | 1   | 1   | 1   | 1   |
|           | 1           |            |               | 1     |       | 1    |        | 1   | 1   | 1   | 1        | 1       |           | 1      |          |     |     | 2   |     | 2   |
|           | 1           |            |               | 1     |       | 1    |        | 1   | 1   | 1   | 1        | 1       |           | 1      |          |     | 1   | 2   | 1   | 2   |
|           | 1           |            |               | 1     |       | 1    |        | 1   | 1   | 1   | 1        | 2       |           | 1      |          |     | 2   |     | 2   |     |
|           | 1           |            |               | 1     |       | 1    |        | 1   | 1   | 1   | 1        | 2       |           | 1      |          |     | 2   | 1   | 2   | 1   |
| 1         | 1           |            |               | 1     |       |      | 1      | 2   | 1   | 1   | 2        | 3       |           | 1      |          |     | 2   | 2   | 2   | 2   |

Without DNA damage: proliferation  
With DNA damage: loss of senescence

### CHEK2 GoF

|   | apoptosis | cyclearrest | senescence | proliferation | CHEK1 | CHEK2 | Mdm2 | p14ARF | p53 | p21 | RB1 | p16INK4a | p38MAPK | CDK46CycD | Cdc25A | CDK2CycE | E2F | ATM | ATR | DSB | SSB |
|---|-----------|-------------|------------|---------------|-------|-------|------|--------|-----|-----|-----|----------|---------|-----------|--------|----------|-----|-----|-----|-----|-----|
|   | 1         |             |            |               | 1     | 1     |      | 1      | 1   | 1   | 1   |          |         | 1         |        |          |     |     |     |     |     |
|   | 1         |             |            |               | 1     | 1     |      | 1      | 1   | 1   | 1   | 1        | 1       |           | 1      |          |     |     | 1   |     | 1   |
|   | 1         |             |            |               | 1     | 1     |      | 1      | 1   | 1   | 1   | 1        | 1       |           | 1      |          |     | 1   |     | 1   | 1   |
|   | 1         |             |            |               | 1     | 1     |      | 1      | 1   | 1   | 1   | 1        | 1       |           | 1      |          |     | 1   | 1   | 1   | 1   |
|   | 1         | 1           |            |               | 1     | 1     |      | 1      | 1   | 1   | 1   | 1        | 1       |           |        |          |     | 2   |     | 2   | 2   |
|   | 1         | 1           |            |               | 1     | 1     |      | 1      | 1   | 1   | 1   | 1        | 1       |           |        |          |     | 1   | 2   | 1   | 2   |
|   | 1         | 1           |            |               | 1     | 1     |      | 1      | 1   | 1   | 1   | 1        | 2       |           |        |          |     | 2   |     | 2   |     |
|   | 1         | 1           |            |               | 1     | 1     |      | 1      | 1   | 1   | 1   | 1        | 2       |           |        |          |     | 2   | 1   | 2   | 1   |
| 1 | 1         |             |            |               | 1     | 1     |      | 1      | 2   | 1   | 1   | 2        | 3       |           |        |          |     | 2   | 2   | 2   | 2   |

Without DNA damage: loss of proliferation

With DNA damage: senescence enhanced

### CHEK1 LoF

|   | apoptosis | cyclearrest | senescence | proliferation | CHEK1 | CHEK2 | Mdm2 | p14ARF | p53 | p21 | RB1 | p16INK4a | p38MAPK | CDK46CycD | Cdc25A | CDK2CycE | E2F | ATM | ATR | DSB | SSB |
|---|-----------|-------------|------------|---------------|-------|-------|------|--------|-----|-----|-----|----------|---------|-----------|--------|----------|-----|-----|-----|-----|-----|
|   |           |             |            | 1             |       |       |      | 1      |     |     |     |          |         | 1         | 2      | 1        | 1   |     |     |     |     |
|   | 1         |             |            |               |       |       | 1    | 1      | 1   | 1   | 1   | 1        | 1       |           | 1      |          |     |     | 1   |     | 1   |
|   | 1         |             |            |               |       |       | 1    | 1      | 1   | 1   | 1   | 1        | 1       |           | 1      |          |     |     | 2   |     | 2   |
|   | 1         |             |            |               |       |       | 1    | 1      | 1   | 1   | 1   | 1        | 1       |           | 1      |          |     | 1   |     | 1   | 1   |
|   | 1         |             |            |               |       |       | 1    | 1      | 1   | 1   | 1   | 1        | 1       |           | 1      |          |     | 1   | 1   | 1   | 1   |
|   | 1         |             |            |               |       |       | 1    | 1      | 1   | 1   | 1   | 1        | 1       |           | 1      |          |     | 1   | 2   | 1   | 2   |
|   | 1         |             |            |               | 1     | 1     |      | 1      | 1   | 1   | 1   | 1        | 2       |           | 1      |          |     | 2   |     | 2   |     |
|   | 1         |             |            |               | 1     | 1     |      | 1      | 1   | 1   | 1   | 1        | 2       |           | 1      |          |     | 2   | 1   | 2   | 1   |
| 1 | 1         |             |            |               | 1     |       | 1    | 2      | 1   | 1   | 1   | 2        | 3       |           | 1      |          |     | 2   | 2   | 2   | 2   |

Without DNA damage: proliferation

With DNA damage: loss of senescence

### CHEK1 GoF

|   | apoptosis | cyclearrest | senescence | proliferation | CHEK1 | CHEK2 | Mdm2 | p14ARF | p53 | p21 | RB1 | p16INK4a | p38MAPK | CDK46CycD | Cdc25A | CDK2CycE | E2F | ATM | ATR | DSB | SSB |
|---|-----------|-------------|------------|---------------|-------|-------|------|--------|-----|-----|-----|----------|---------|-----------|--------|----------|-----|-----|-----|-----|-----|
|   |           |             |            |               | 1     |       | 1    |        | 1   | 1   | 1   |          |         |           | 1      |          |     |     |     |     |     |
|   | 1         |             |            |               | 1     |       | 1    |        | 1   | 1   | 1   | 1        | 1       |           | 1      |          |     |     | 1   |     | 1   |
|   | 1         |             |            |               | 1     |       | 1    |        | 1   | 1   | 1   | 1        | 1       |           | 1      |          |     |     | 2   |     | 2   |
|   | 1         |             |            |               | 1     |       | 1    |        | 1   | 1   | 1   | 1        | 1       |           | 1      |          |     | 1   |     | 1   | 1   |
|   | 1         |             |            |               | 1     |       | 1    |        | 1   | 1   | 1   | 1        | 1       |           | 1      |          |     | 1   | 1   | 1   | 1   |
|   | 1         |             |            |               | 1     |       | 1    |        | 1   | 1   | 1   | 1        | 1       |           | 1      |          |     | 1   | 2   | 1   | 2   |
|   | 1         | 1           |            |               | 1     | 1     |      | 1      | 1   | 1   | 1   | 1        | 2       |           |        |          |     | 2   |     | 2   |     |
|   | 1         | 1           |            |               | 1     | 1     |      | 1      | 1   | 1   | 1   | 1        | 2       |           |        |          |     | 2   | 1   | 2   | 1   |
| 1 | 1         |             |            |               | 1     | 1     |      | 1      | 2   | 1   | 1   | 2        | 3       |           |        |          |     | 2   | 2   | 2   | 2   |

Without DNA damage: loss of proliferation

With DNA damage: similar to the wild type

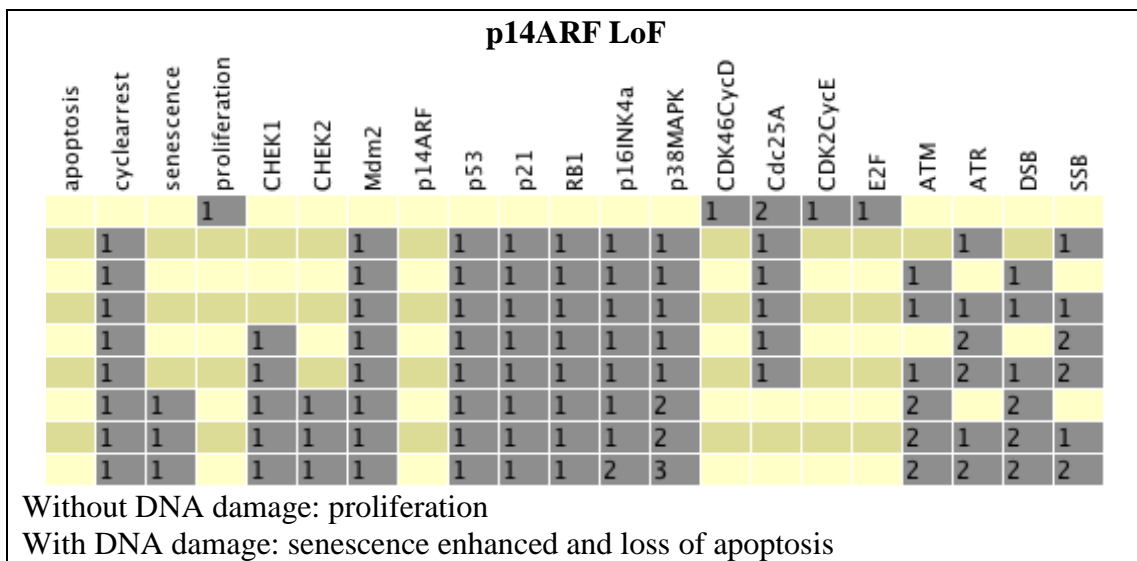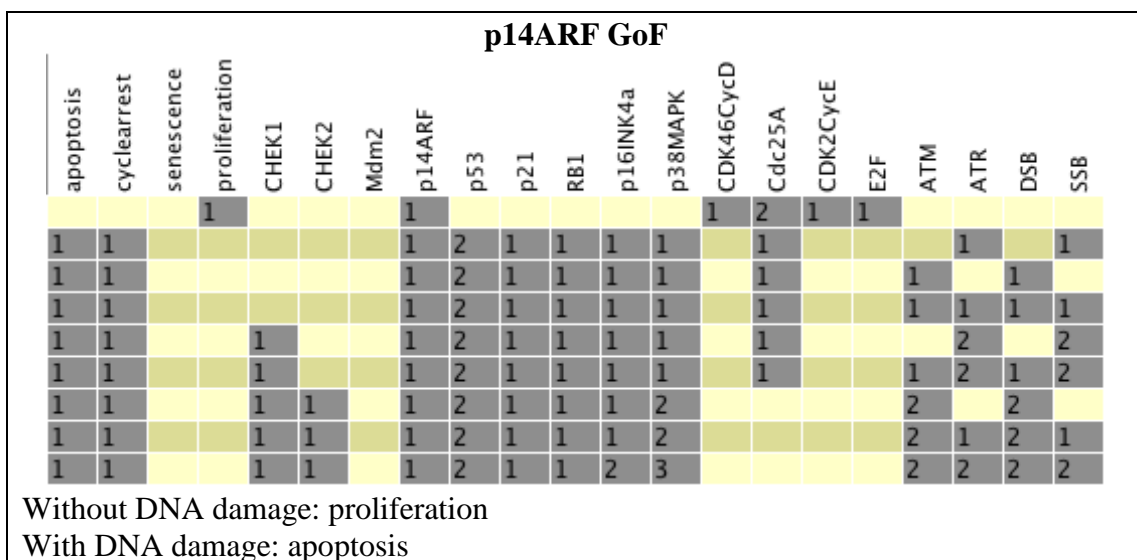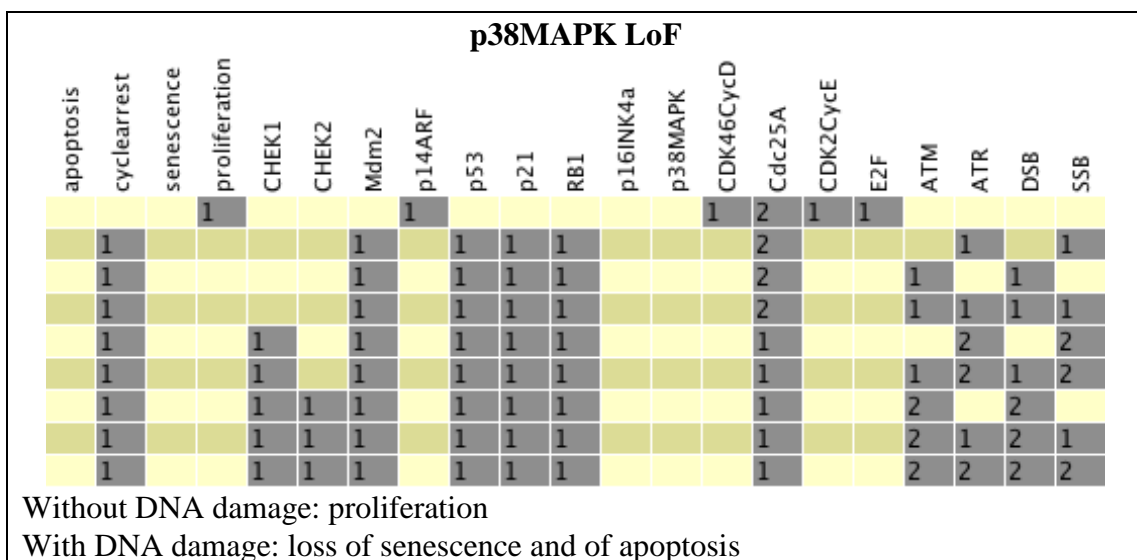

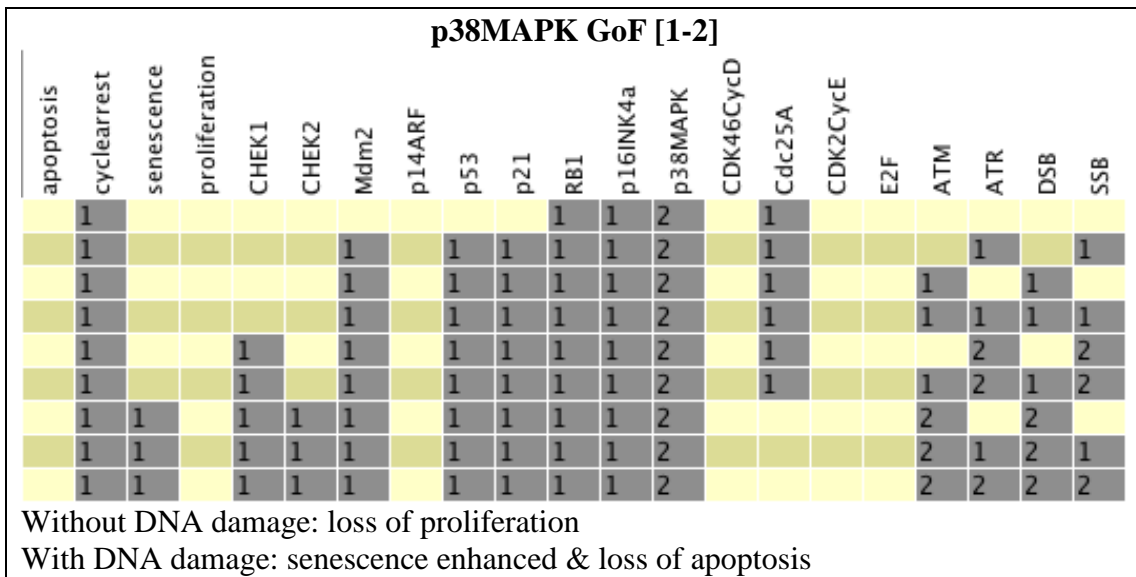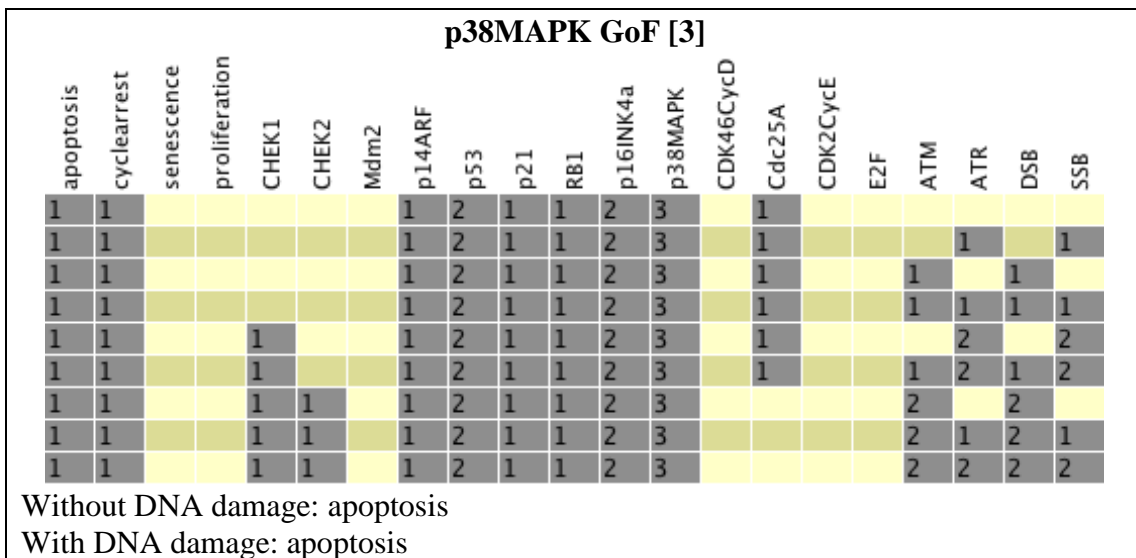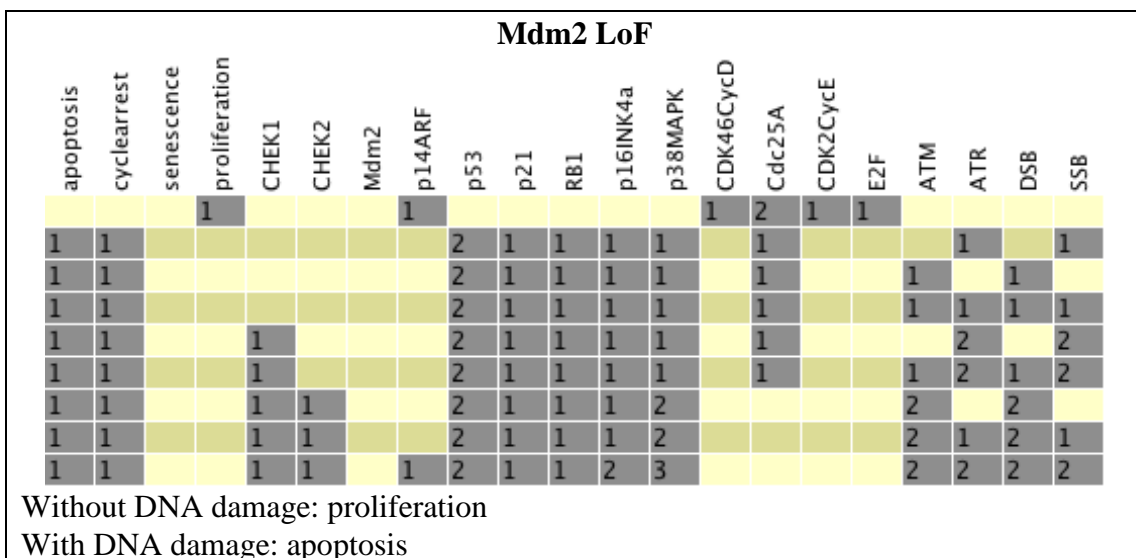

### Mdm2 GoF

|  | apoptosis | cyclearrest | senescence | proliferation | CHEK1 | CHEK2 | Mdm2 | p14ARF | p53 | p21 | RBI | p16INK4a | p38MAPK | CDK46CycD | Cdc25A | CDK2CycE | E2F | ATM | ATR | DSB | SSB |   |
|--|-----------|-------------|------------|---------------|-------|-------|------|--------|-----|-----|-----|----------|---------|-----------|--------|----------|-----|-----|-----|-----|-----|---|
|  |           |             |            | 1             |       |       | 1    | 1      |     |     |     |          |         | 1         | 2      | 1        | 1   |     |     |     |     |   |
|  | 1         |             |            |               |       |       | 1    | 1      | 1   | 1   | 1   | 1        | 1       |           | 1      |          |     |     | 1   |     |     | 1 |
|  | 1         |             |            |               |       |       | 1    | 1      | 1   | 1   | 1   | 1        | 1       |           | 1      |          |     | 1   |     | 1   |     |   |
|  | 1         |             |            |               | 1     |       | 1    | 1      | 1   | 1   | 1   | 1        | 1       |           | 1      |          |     |     |     | 2   |     | 2 |
|  | 1         |             |            |               | 1     |       | 1    | 1      | 1   | 1   | 1   | 1        | 1       |           | 1      |          |     | 1   | 2   | 1   | 2   | 2 |
|  | 1         | 1           |            |               | 1     | 1     | 1    | 1      | 1   | 1   | 1   | 1        | 2       |           |        |          |     | 2   |     | 2   |     |   |
|  | 1         | 1           |            |               | 1     | 1     | 1    | 1      | 1   | 1   | 1   | 1        | 2       |           |        |          |     | 2   | 1   | 2   | 2   | 1 |
|  | 1         | 1           |            |               | 1     | 1     | 1    | 1      | 1   | 1   | 1   | 2        | 3       |           |        |          |     | 2   | 2   | 2   | 2   | 2 |

Without DNA damage: proliferation

With DNA damage: senescence enhanced & loss of apoptosis

### p16INK4A LoF

|  | apoptosis | cyclearrest | senescence | proliferation | CHEK1 | CHEK2 | Mdm2 | p14ARF | p53 | p21 | RBI | p16INK4a | p38MAPK | CDK46CycD | Cdc25A | CDK2CycE | E2F | ATM | ATR | DSB | SSB |   |
|--|-----------|-------------|------------|---------------|-------|-------|------|--------|-----|-----|-----|----------|---------|-----------|--------|----------|-----|-----|-----|-----|-----|---|
|  |           |             |            | 1             |       |       |      | 1      |     |     |     |          |         | 1         | 2      | 1        | 1   |     |     |     |     |   |
|  | 1         |             |            |               |       |       | 1    | 1      | 1   | 1   | 1   |          | 1       |           | 1      |          |     |     | 1   |     |     | 1 |
|  | 1         |             |            |               |       |       | 1    | 1      | 1   | 1   | 1   |          | 1       |           | 1      |          |     | 1   |     | 1   |     |   |
|  | 1         |             |            |               | 1     |       | 1    | 1      | 1   | 1   | 1   |          | 1       |           | 1      |          |     |     |     | 2   |     | 2 |
|  | 1         |             |            |               | 1     |       | 1    | 1      | 1   | 1   | 1   |          | 1       |           | 1      |          |     | 1   | 2   | 1   | 2   | 2 |
|  | 1         |             |            |               | 1     | 1     | 1    | 1      | 1   | 1   | 1   |          | 2       |           |        |          |     | 2   |     | 2   |     |   |
|  | 1         |             |            |               | 1     | 1     | 1    | 1      | 1   | 1   | 1   |          | 2       |           |        |          |     | 2   | 1   | 2   | 2   | 1 |
|  | 1         | 1           |            |               | 1     | 1     |      | 1      | 2   | 1   | 1   |          | 3       |           |        |          |     | 2   | 2   | 2   | 2   | 2 |

Without DNA damage: proliferation

With DNA damage: loss of senescence

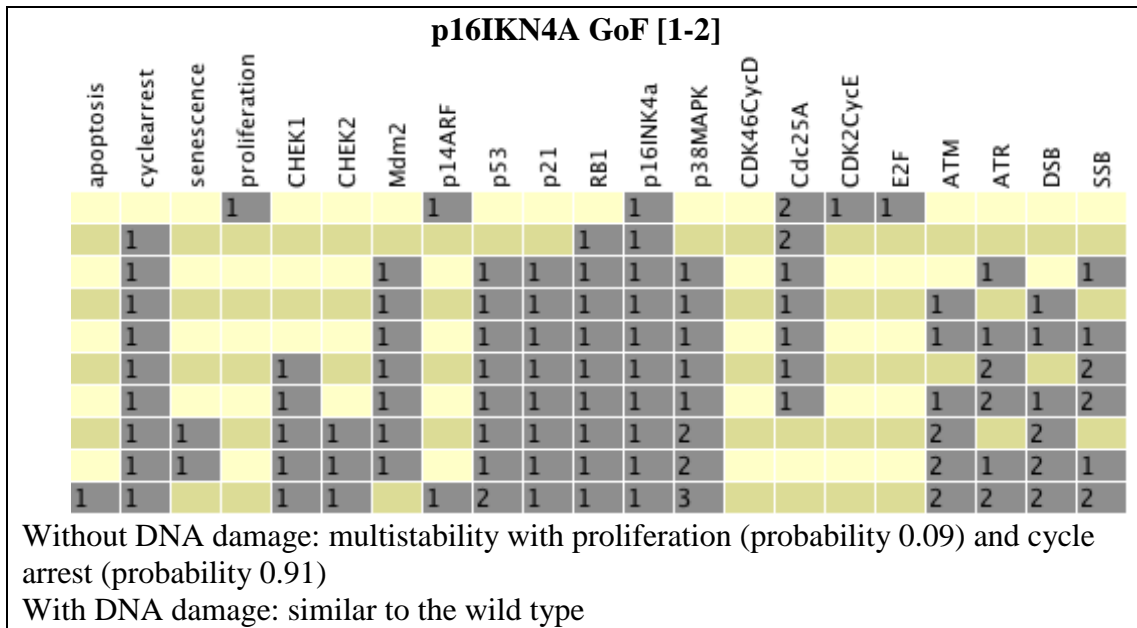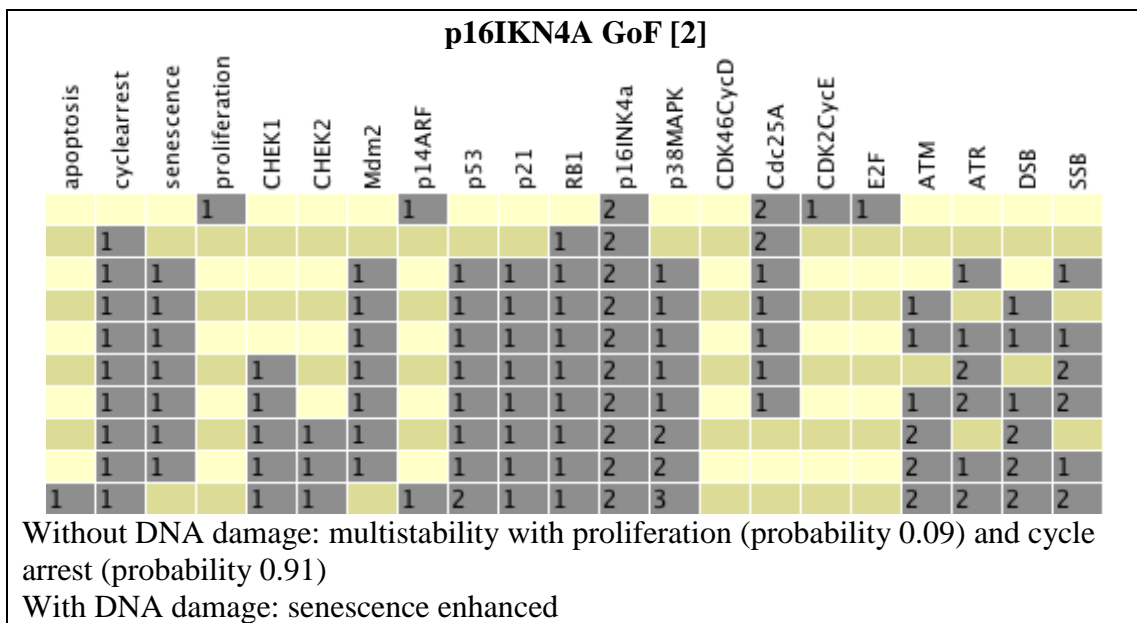

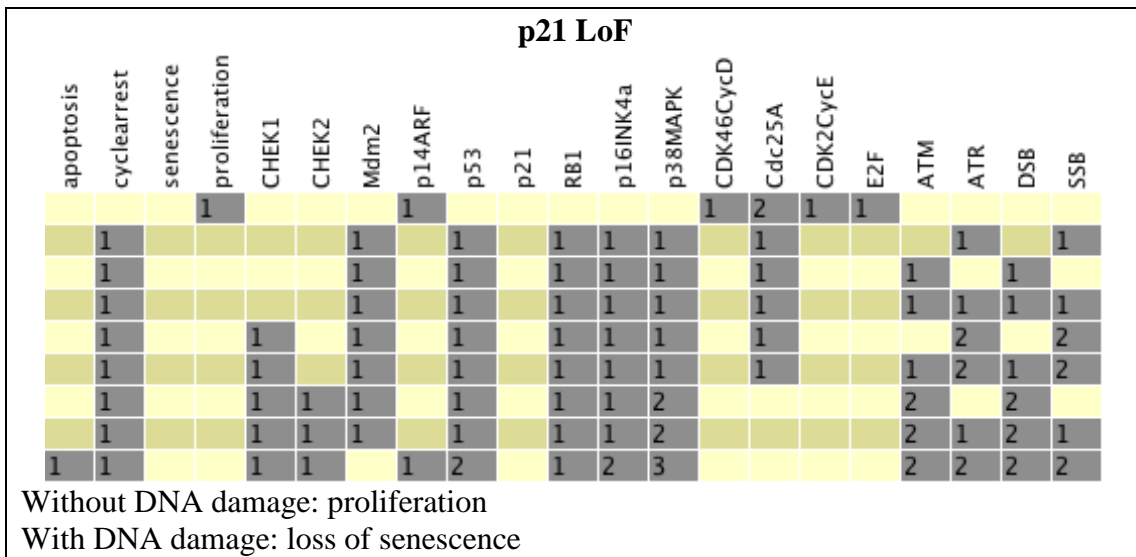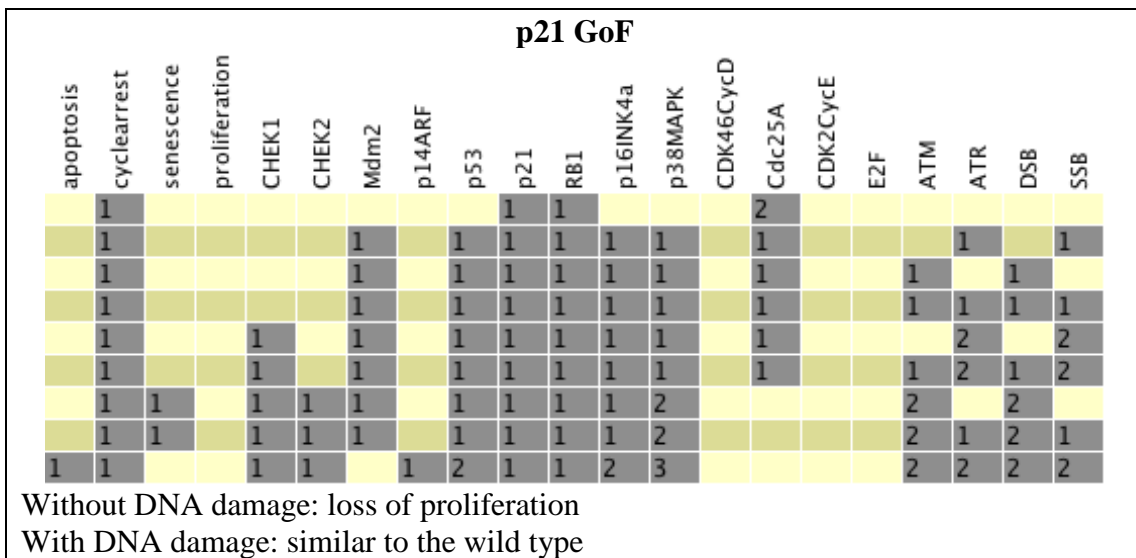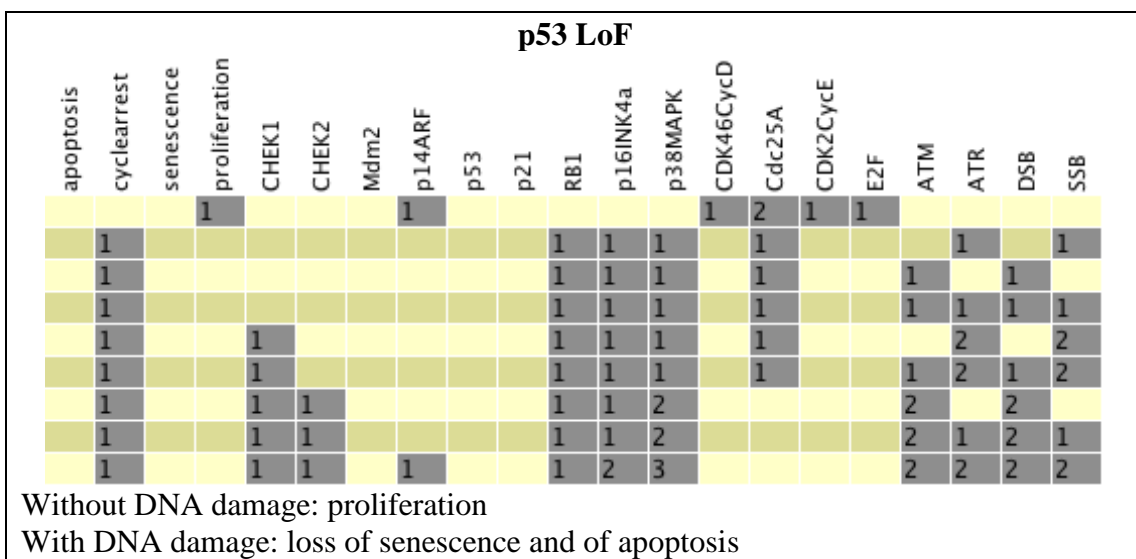

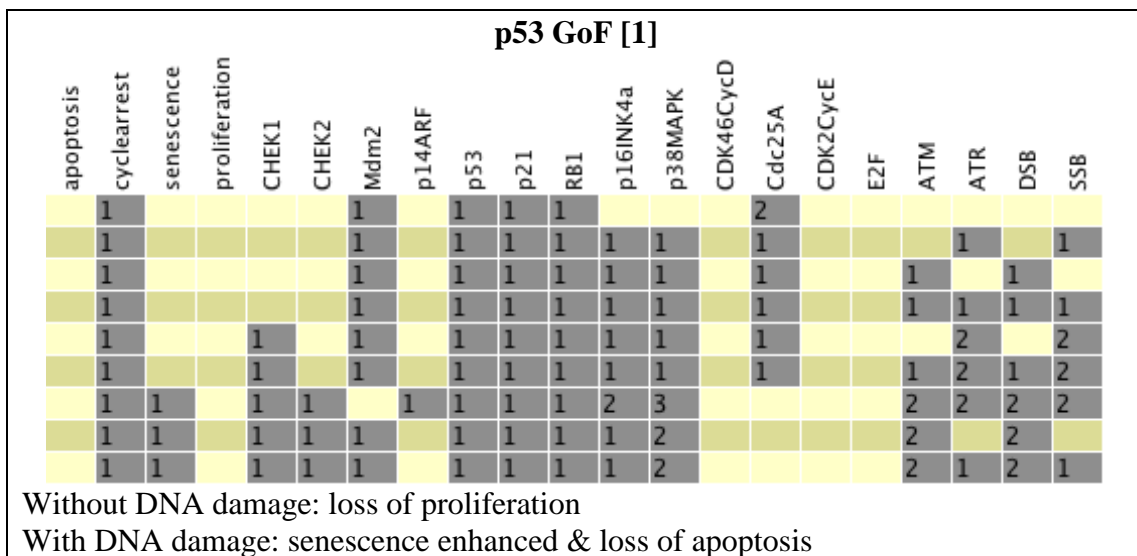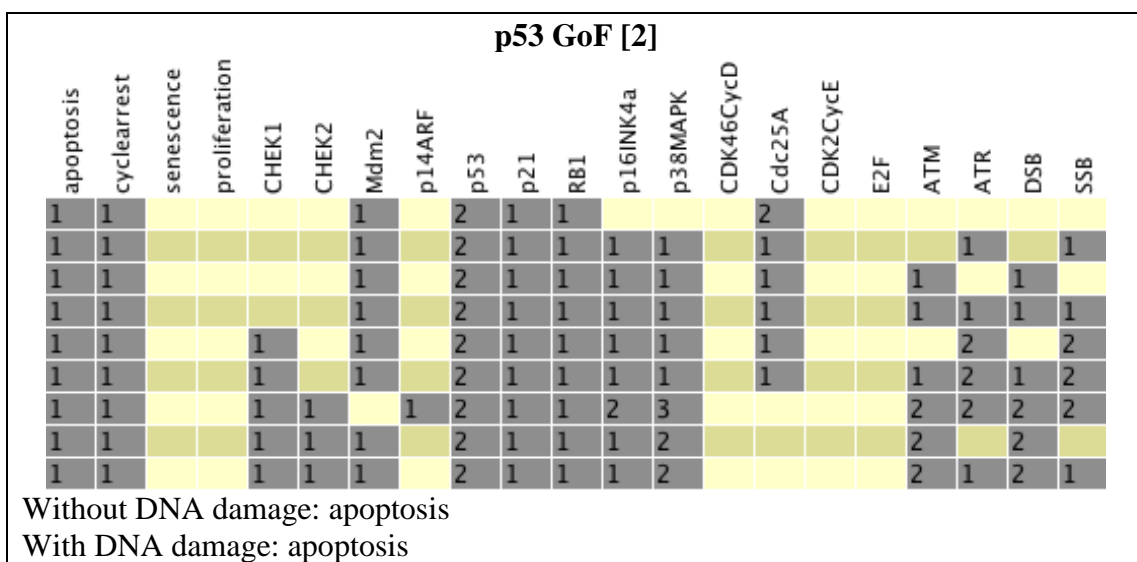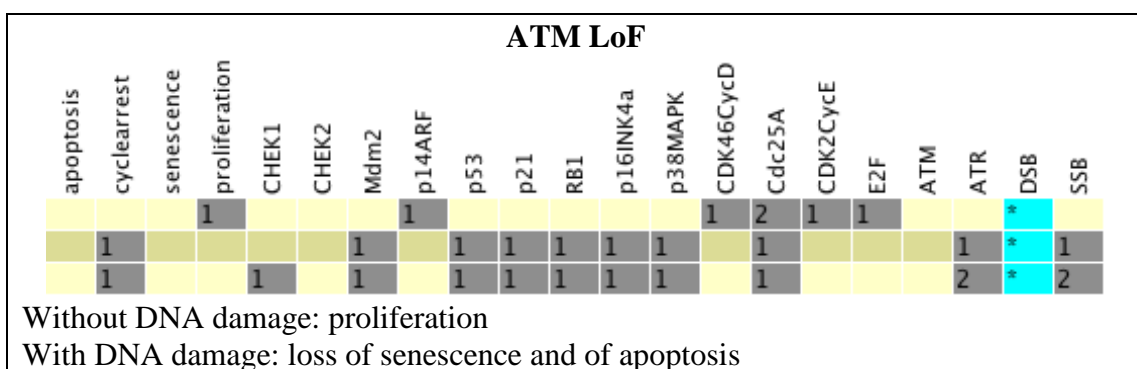



### ATM GoF [1]

|                     | apoptosis | cyclearrest | senescence | proliferation | CHEK1 | CHEK2 | Mdm2 | p14ARF | p53 | p21 | RB1 | p16INK4a | p38MAPK | CDK46CycD | Cdc25A | CDK2CycE | E2F | ATM | ATR | DSB | SSB |  |
|---------------------|-----------|-------------|------------|---------------|-------|-------|------|--------|-----|-----|-----|----------|---------|-----------|--------|----------|-----|-----|-----|-----|-----|--|
| Without DNA damage: | 1         |             |            |               |       |       |      |        |     |     |     |          |         |           |        |          |     |     |     |     |     |  |
| With DNA damage:    | 1         |             |            |               |       |       |      |        |     |     |     |          |         |           |        |          |     | 1   | 1   | *   |     |  |
|                     | 1         |             |            | 1             |       |       | 1    |        | 1   | 1   | 1   | 1        | 1       |           | 1      |          |     | 1   | 2   | *   | 2   |  |

Without DNA damage: loss of proliferation

With DNA damage: loss of senescence and of apoptosis

### ATM GoF [2]

|                     | apoptosis | cyclearrest | senescence | proliferation | CHEK1 | CHEK2 | Mdm2 | p14ARF | p53 | p21 | RB1 | p16INK4a | p38MAPK | CDK46CycD | Cdc25A | CDK2CycE | E2F | ATM | ATR | DSB | SSB |   |
|---------------------|-----------|-------------|------------|---------------|-------|-------|------|--------|-----|-----|-----|----------|---------|-----------|--------|----------|-----|-----|-----|-----|-----|---|
| Without DNA damage: |           | 1           | 1          |               | 1     | 1     | 1    |        | 1   | 1   | 1   | 1        | 2       |           |        |          |     | 2   |     |     |     |   |
| With DNA damage:    | 1         | 1           |            |               | 1     | 1     |      | 1      | 2   | 1   | 1   | 2        | 3       |           |        |          |     | 2   | 2   | *   | *   | 1 |
|                     |           |             |            | 1             | 1     | 1     |      | 1      | 1   | 1   | 1   | 1        | 2       |           |        |          |     | 2   | 2   | *   | *   | 2 |

Without DNA damage: senescence

With DNA damage: senescence enhanced

### ATR LoF

|                     | apoptosis | cyclearrest | senescence | proliferation | CHEK1 | CHEK2 | Mdm2 | p14ARF | p53 | p21 | RB1 | p16INK4a | p38MAPK | CDK46CycD | Cdc25A | CDK2CycE | E2F | ATM | ATR | DSB | SSB |   |
|---------------------|-----------|-------------|------------|---------------|-------|-------|------|--------|-----|-----|-----|----------|---------|-----------|--------|----------|-----|-----|-----|-----|-----|---|
| Without DNA damage: |           |             |            | 1             |       |       |      | 1      |     |     |     |          |         | 1         | 2      | 1        | 1   |     |     |     |     | * |
| With DNA damage:    | 1         |             |            |               |       |       | 1    |        | 1   | 1   | 1   | 1        | 1       |           | 1      |          |     | 1   |     | 1   | *   | * |
|                     | 1         | 1           |            |               | 1     | 1     | 1    |        | 1   | 1   | 1   | 2        |         |           |        |          |     | 2   |     | 2   | *   | * |

Without DNA damage: proliferation

With DNA damage: senescence enhanced & loss of apoptosis

### ATR GoF [1]

|                     | apoptosis | cyclearrest | senescence | proliferation | CHEK1 | CHEK2 | Mdm2 | p14ARF | p53 | p21 | RB1 | p16INK4a | p38MAPK | CDK46CycD | Cdc25A | CDK2CycE | E2F | ATM | ATR | DSB | SSB |   |
|---------------------|-----------|-------------|------------|---------------|-------|-------|------|--------|-----|-----|-----|----------|---------|-----------|--------|----------|-----|-----|-----|-----|-----|---|
| Without DNA damage: |           | 1           |            |               |       |       | 1    |        | 1   | 1   | 1   | 1        | 1       |           | 1      |          |     |     |     | 1   |     | * |
| With DNA damage:    | 1         | 1           |            |               |       |       | 1    |        | 1   | 1   | 1   | 1        | 1       |           | 1      |          |     | 1   | 1   | 1   | *   | * |
|                     | 1         | 1           |            |               | 1     | 1     | 1    |        | 1   | 1   | 1   | 2        |         |           |        |          |     | 2   | 1   | 2   | *   | * |

Without DNA damage: loss of proliferation

With DNA damage: senescence enhanced & loss of apoptosis

**ATR GoF [2]**

|  | apoptosis | cyclearrest | senescence | proliferation | CHEK1 | CHEK2 | Mdm2 | p14ARF | p53 | p21 | RB1 | p16INK4a | p38MAPK | CDK46CycD | Cdc25A | CDK2CycE | E2F | ATM | ATR | DSB | SSB |   |
|--|-----------|-------------|------------|---------------|-------|-------|------|--------|-----|-----|-----|----------|---------|-----------|--------|----------|-----|-----|-----|-----|-----|---|
|  | 1         | 1           |            |               | 1     |       | 1    | 1      | 1   | 1   | 1   | 1        | 1       |           | 1      |          |     |     | 2   |     |     | * |
|  | 1         | 1           |            |               | 1     |       | 1    | 1      | 1   | 1   | 1   | 1        | 1       |           | 1      |          |     | 1   | 2   | 1   |     | * |
|  | 1         | 1           |            |               | 1     | 1     |      | 1      | 2   | 1   | 1   | 2        | 3       |           |        |          |     | 2   | 2   | 2   |     | * |

Without DNA damage: loss of proliferation  
 With DNA damage: loss of senescence & apoptosis enhanced

**RB1 LoF**

|  | apoptosis | cyclearrest | senescence | proliferation | CHEK1 | CHEK2 | Mdm2 | p14ARF | p53 | p21 | RB1 | p16INK4a | p38MAPK | CDK46CycD | Cdc25A | CDK2CycE | E2F | ATM | ATR | DSB | SSB |   |
|--|-----------|-------------|------------|---------------|-------|-------|------|--------|-----|-----|-----|----------|---------|-----------|--------|----------|-----|-----|-----|-----|-----|---|
|  | 1         | 1           |            | 1             |       |       |      | 1      | 2   | 1   |     | 1        | 1       | 1         | 2      | 1        | 1   |     |     | 1   |     | 1 |
|  | 1         | 1           |            |               |       |       |      | 1      | 2   | 1   |     | 1        | 1       | 1         | 1      | 1        | 1   | 1   |     | 1   | 1   | 1 |
|  | 1         | 1           |            |               |       |       |      | 1      | 2   | 1   |     | 1        | 1       | 1         | 1      | 1        | 1   | 1   |     | 1   | 1   | 1 |
|  | 1         | 1           |            |               | 1     |       |      | 1      | 2   | 1   |     | 1        | 1       | 1         | 1      | 1        | 1   | 1   |     | 2   | 1   | 2 |
|  | 1         | 1           |            |               | 1     |       |      | 1      | 2   | 1   |     | 1        | 1       | 1         | 1      | 1        | 1   | 1   |     | 2   | 1   | 2 |
|  | 1         | 1           |            |               | 1     | 1     |      | 1      | 2   | 1   |     | 1        | 2       |           | 1      | 1        | 1   | 2   |     | 2   | 1   | 2 |
|  | 1         | 1           |            |               | 1     | 1     |      | 1      | 2   | 1   |     | 1        | 2       |           | 1      | 1        | 1   | 2   |     | 2   | 1   | 2 |
|  | 1         | 1           |            |               | 1     | 1     |      | 1      | 2   | 1   |     | 2        | 3       |           |        |          | 1   | 2   | 2   | 2   | 2   | 2 |

Without DNA damage: proliferation  
 With DNA damage: apoptosis

**RB1 GoF**

|  | apoptosis | cyclearrest | senescence | proliferation | CHEK1 | CHEK2 | Mdm2 | p14ARF | p53 | p21 | RB1 | p16INK4a | p38MAPK | CDK46CycD | Cdc25A | CDK2CycE | E2F | ATM | ATR | DSB | SSB |   |
|--|-----------|-------------|------------|---------------|-------|-------|------|--------|-----|-----|-----|----------|---------|-----------|--------|----------|-----|-----|-----|-----|-----|---|
|  |           | 1           |            |               |       |       |      |        |     |     | 1   |          |         | 1         | 2      |          |     |     |     |     |     |   |
|  |           | 1           |            |               |       |       | 1    |        | 1   | 1   | 1   | 1        | 1       | 1         | 1      |          |     |     | 1   |     |     | 1 |
|  |           | 1           |            |               |       |       | 1    |        | 1   | 1   | 1   | 1        | 1       | 1         | 1      |          |     | 1   |     | 1   |     |   |
|  |           | 1           |            |               |       |       | 1    |        | 1   | 1   | 1   | 1        | 1       | 1         | 1      |          |     | 1   | 1   | 1   | 1   | 1 |
|  |           | 1           |            |               | 1     |       | 1    |        | 1   | 1   | 1   | 1        | 1       | 1         | 1      |          |     | 1   | 2   |     | 2   | 2 |
|  |           | 1           |            |               | 1     |       | 1    |        | 1   | 1   | 1   | 1        | 1       | 1         | 1      |          |     | 1   | 2   | 1   | 1   | 2 |
|  |           | 1           | 1          |               | 1     | 1     | 1    |        | 1   | 1   | 1   | 1        | 2       |           |        |          |     | 2   |     | 2   |     |   |
|  |           | 1           | 1          |               | 1     | 1     | 1    |        | 1   | 1   | 1   | 1        | 2       |           |        |          |     | 2   | 1   | 2   |     | 1 |
|  | 1         | 1           |            |               | 1     | 1     |      | 1      | 2   | 1   | 1   | 2        | 3       |           |        |          |     | 2   | 2   | 2   |     | 2 |

Without DNA damage: loss of proliferation  
 With DNA damage: similar to the wild type

### CDC25A LoF

|   | apoptosis | cyclearrest | senescence | proliferation | CHEK1 | CHEK2 | Mdm2 | p14ARF | p53 | p21 | RB1 | p16INK4a | p38MAPK | CDK46CycD | Cdc25A | CDK2CycE | E2F | ATM | ATR | DSB | SSB |   |
|---|-----------|-------------|------------|---------------|-------|-------|------|--------|-----|-----|-----|----------|---------|-----------|--------|----------|-----|-----|-----|-----|-----|---|
| 1 | 1         |             |            |               | 1     | 1     |      | 1      | 2   | 1   | 1   | 2        | 3       |           |        |          | 2   | 2   | 2   | 2   | 2   |   |
| 2 | 1         | 1           |            |               |       |       | 1    | 1      | 1   | 1   | 1   | 1        | 1       |           |        |          |     |     |     |     |     | 1 |
| 3 | 1         | 1           |            |               |       |       | 1    | 1      | 1   | 1   | 1   | 1        | 1       |           |        |          |     | 1   |     | 1   | 1   | 1 |
| 4 | 1         | 1           |            |               |       |       | 1    | 1      | 1   | 1   | 1   | 1        | 1       |           |        |          |     | 1   | 1   | 1   | 1   | 1 |
| 5 | 1         | 1           |            |               | 1     |       | 1    | 1      | 1   | 1   | 1   | 1        | 1       |           |        |          |     |     | 2   |     | 2   | 2 |
| 6 | 1         | 1           |            |               | 1     |       | 1    | 1      | 1   | 1   | 1   | 1        | 1       |           |        |          |     | 1   | 2   | 1   | 2   | 2 |
| 7 | 1         | 1           |            |               | 1     | 1     | 1    | 1      | 1   | 1   | 1   | 2        |         |           |        |          |     | 2   |     | 2   |     |   |
| 8 | 1         | 1           |            |               | 1     | 1     | 1    | 1      | 1   | 1   | 1   | 2        |         |           |        |          |     | 2   | 1   | 2   | 2   | 1 |

Without DNA damage: loss of proliferation  
 With DNA damage: senescence enhanced

### CDC25A GoF [1-2]

|   | apoptosis | cyclearrest | senescence | proliferation | CHEK1 | CHEK2 | Mdm2 | p14ARF | p53 | p21 | RB1 | p16INK4a | p38MAPK | CDK46CycD | Cdc25A | CDK2CycE | E2F | ATM | ATR | DSB | SSB |   |
|---|-----------|-------------|------------|---------------|-------|-------|------|--------|-----|-----|-----|----------|---------|-----------|--------|----------|-----|-----|-----|-----|-----|---|
| 1 | 1         | 1           |            |               | 1     | 1     |      | 1      | 2   | 1   | 1   | 2        | 3       |           | 1      |          |     | 2   | 2   | 2   | 2   | 2 |
| 2 |           | 1           |            |               |       |       | 1    | 1      | 1   | 1   | 1   | 1        | 1       | 1         | 2      | 1        |     |     |     | 1   |     | 1 |
| 3 |           | 1           |            |               |       |       | 1    | 1      | 1   | 1   | 1   | 1        | 1       | 1         | 1      | 1        |     |     | 1   | 1   | 1   | 1 |
| 4 |           | 1           |            |               |       |       | 1    | 1      | 1   | 1   | 1   | 1        | 1       | 1         | 1      | 1        |     |     | 1   | 1   | 1   | 1 |
| 5 |           | 1           |            |               | 1     |       | 1    | 1      | 1   | 1   | 1   | 1        | 1       |           |        |          |     |     | 2   |     | 2   | 2 |
| 6 |           | 1           |            |               | 1     |       | 1    | 1      | 1   | 1   | 1   | 1        | 1       |           |        |          |     | 1   | 2   | 1   | 2   | 2 |
| 7 |           | 1           |            |               | 1     | 1     | 1    | 1      | 1   | 1   | 1   | 2        |         |           |        |          |     | 2   |     | 2   |     |   |
| 8 |           | 1           |            |               | 1     | 1     | 1    | 1      | 1   | 1   | 1   | 2        |         |           |        |          |     | 2   | 1   | 2   | 2   | 1 |

Without DNA damage: proliferation  
 With DNA damage: loss of senescence

### E2F LoF

|   | apoptosis | cyclearrest | senescence | proliferation | CHEK1 | CHEK2 | Mdm2 | p14ARF | p53 | p21 | RB1 | p16INK4a | p38MAPK | CDK46CycD | Cdc25A | CDK2CycE | E2F | ATM | ATR | DSB | SSB |   |
|---|-----------|-------------|------------|---------------|-------|-------|------|--------|-----|-----|-----|----------|---------|-----------|--------|----------|-----|-----|-----|-----|-----|---|
| 1 | 1         | 1           |            |               | 1     | 1     |      | 1      | 2   | 1   | 1   | 2        | 3       |           |        |          |     | 2   | 2   | 2   | 2   | 2 |
| 2 |           | 1           |            |               |       |       | 1    | 1      | 1   | 1   | 1   | 1        | 1       | 1         | 2      | 1        |     |     |     | 1   |     | 1 |
| 3 |           | 1           |            |               |       |       | 1    | 1      | 1   | 1   | 1   | 1        | 1       | 1         | 1      | 1        |     |     | 1   |     | 1   | 1 |
| 4 |           | 1           |            |               |       |       | 1    | 1      | 1   | 1   | 1   | 1        | 1       | 1         | 1      | 1        |     |     | 1   | 1   | 1   | 1 |
| 5 |           | 1           |            |               | 1     |       | 1    | 1      | 1   | 1   | 1   | 1        | 1       |           |        |          |     |     | 2   |     | 2   | 2 |
| 6 |           | 1           |            |               | 1     |       | 1    | 1      | 1   | 1   | 1   | 1        | 1       |           |        |          |     | 1   | 2   | 1   | 2   | 2 |
| 7 |           | 1           | 1          |               | 1     | 1     | 1    | 1      | 1   | 1   | 1   | 2        |         |           |        |          |     | 2   |     | 2   |     |   |
| 8 |           | 1           | 1          |               | 1     | 1     | 1    | 1      | 1   | 1   | 1   | 2        |         |           |        |          |     | 2   | 1   | 2   | 2   | 1 |

Without DNA damage: loss of proliferation  
 With DNA damage: similar to the wild type

### E2F GoF

|   | apoptosis | cyclearrest | senescence | proliferation | CHEK1 | CHEK2 | Mdm2 | p14ARF | p53 | p21 | RB1 | p16INK4a | p38MAPK | CDK46CycD | Cdc25A | CDK2CycE | E2F | ATM | ATR | DSB | SSB |   |
|---|-----------|-------------|------------|---------------|-------|-------|------|--------|-----|-----|-----|----------|---------|-----------|--------|----------|-----|-----|-----|-----|-----|---|
|   |           |             |            | 1             |       |       |      | 1      |     |     |     |          |         | 1         | 2      | 1        | 1   |     |     |     |     |   |
| 1 | 1         |             |            |               |       |       |      | 1      | 2   | 1   | 1   | 1        | 1       |           | 1      |          | 1   |     | 1   |     |     | 1 |
| 1 | 1         |             |            |               |       |       |      | 1      | 2   | 1   | 1   | 1        | 1       |           | 1      |          | 1   | 1   |     | 1   |     |   |
| 1 | 1         |             |            |               |       |       |      | 1      | 2   | 1   | 1   | 1        | 1       |           | 1      |          | 1   | 1   | 1   | 1   | 1   | 1 |
| 1 | 1         |             |            |               | 1     |       |      | 1      | 2   | 1   | 1   | 1        | 1       |           | 1      |          | 1   |     | 2   |     |     | 2 |
| 1 | 1         |             |            |               | 1     |       |      | 1      | 2   | 1   | 1   | 1        | 1       |           | 1      |          | 1   | 1   | 2   | 1   | 2   | 2 |
| 1 | 1         |             |            |               | 1     | 1     |      | 1      | 2   | 1   | 1   | 1        | 2       |           |        |          | 1   | 2   |     | 2   |     |   |
| 1 | 1         |             |            |               | 1     | 1     |      | 1      | 2   | 1   | 1   | 1        | 2       |           |        |          | 1   | 2   | 1   | 2   | 2   | 1 |
| 1 | 1         |             |            |               | 1     | 1     |      | 1      | 2   | 1   | 1   | 2        | 3       |           |        |          | 1   | 2   | 2   | 2   | 2   | 2 |

Without DNA damage: proliferation

With DNA damage: apoptosis

### p53 and Mdm2 LoF (double mutant)

|  | apoptosis | cyclearrest | senescence | proliferation | CHEK1 | CHEK2 | Mdm2 | p14ARF | p53 | p21 | RB1 | p16INK4a | p38MAPK | CDK46CycD | Cdc25A | CDK2CycE | E2F | ATM | ATR | DSB | SSB |   |
|--|-----------|-------------|------------|---------------|-------|-------|------|--------|-----|-----|-----|----------|---------|-----------|--------|----------|-----|-----|-----|-----|-----|---|
|  |           |             |            | 1             |       |       |      | 1      |     |     |     |          |         | 1         | 2      | 1        | 1   |     |     |     |     |   |
|  | 1         |             |            |               |       |       |      |        |     |     | 1   | 1        | 1       |           | 1      |          |     |     | 1   |     |     | 1 |
|  | 1         |             |            |               |       |       |      |        |     |     | 1   | 1        | 1       |           | 1      |          |     |     | 1   |     | 1   |   |
|  | 1         |             |            |               | 1     |       |      |        |     |     | 1   | 1        | 1       |           | 1      |          |     |     | 2   |     |     | 2 |
|  | 1         |             |            |               | 1     |       |      |        |     |     | 1   | 1        | 1       |           | 1      |          |     | 1   | 2   | 1   | 2   | 2 |
|  | 1         |             |            |               | 1     | 1     |      |        |     |     | 1   | 1        | 2       |           |        |          |     | 2   |     | 2   |     |   |
|  | 1         |             |            |               | 1     | 1     |      |        |     |     | 1   | 1        | 2       |           |        |          |     | 2   | 1   | 2   | 2   | 1 |
|  | 1         |             |            |               | 1     | 1     |      | 1      |     |     | 1   | 2        | 3       |           |        |          |     | 2   | 2   | 2   | 2   | 2 |

Without DNA damage: proliferation

With DNA damage: loss of senescence and of apoptosis
